# Supplementary material for: Hohe Krankheitslast bei Patienten mit ANCA-assoziierter Vaskulitis
Source: Springer Nature journal article supplement (doi:10.1007/s00108-021-01181-z), 2021-10-19
Supplement: MOESM1 [file 19771870]

## Online-Zusatzmaterial

**Tab. S1:** Übersicht über die verwendeten ICD-10 Kodierungen mit entsprechender Erkrankung bzw. Erkrankungsgruppe.

| ICD-10                      | Erkrankung                                                                                                                                                                                                                                                                                                                                                                                                                                                                                                                                           |
|-----------------------------|------------------------------------------------------------------------------------------------------------------------------------------------------------------------------------------------------------------------------------------------------------------------------------------------------------------------------------------------------------------------------------------------------------------------------------------------------------------------------------------------------------------------------------------------------|
| A00-B99                     | Bestimmte infektiöse und parasitäre Krankheiten                                                                                                                                                                                                                                                                                                                                                                                                                                                                                                      |
| D22                         | Melanozytennävus                                                                                                                                                                                                                                                                                                                                                                                                                                                                                                                                     |
| D50                         | Eisenmangelanämie                                                                                                                                                                                                                                                                                                                                                                                                                                                                                                                                    |
| D69.0                       | Purpura anaphylactoides<br>inkl. allergische Vaskulitis, Purpura: allergica, Purpura: nicht-thrombozytopenisch:<br>hämorrhagisch, Purpura: nicht-thrombozytopenisch: idiopathisch, Purpura:<br>Schoenlein-Henoch, Purpura: vaskulär                                                                                                                                                                                                                                                                                                                  |
| D89.1                       | Kryoglobulinämie<br>inkl. Kryoglobulinämie: essentiell, Kryoglobulinämie: gemischt, Kryoglobulinämie:<br>idiopathisch, Kryoglobulinämie: primär, Kryoglobulinämie: sekundär,<br>Kryoglobulinämische: Purpura, Kryoglobulinämische: Vaskulitis                                                                                                                                                                                                                                                                                                        |
| E78                         | Störungen des Lipoproteinstoffwechsels und sonstige Lipidämien                                                                                                                                                                                                                                                                                                                                                                                                                                                                                       |
| E79                         | Störungen des Purin- und Pyrimidinstoffwechsels                                                                                                                                                                                                                                                                                                                                                                                                                                                                                                      |
| E87                         | Sonstige Störungen des Wasser- und Elektrolythaushaltes sowie des Säure-Basen-<br>Gleichgewichts                                                                                                                                                                                                                                                                                                                                                                                                                                                     |
| F32                         | Depressive Episode                                                                                                                                                                                                                                                                                                                                                                                                                                                                                                                                   |
| F45                         | Somatoforme Störungen                                                                                                                                                                                                                                                                                                                                                                                                                                                                                                                                |
| H52                         | Akkommodationsstörungen und Refraktionsfehler                                                                                                                                                                                                                                                                                                                                                                                                                                                                                                        |
| I10                         | Essentielle (primäre) Hypertonie                                                                                                                                                                                                                                                                                                                                                                                                                                                                                                                     |
| I50                         | Herzinsuffizienz                                                                                                                                                                                                                                                                                                                                                                                                                                                                                                                                     |
| I77                         | Sonstige Krankheiten der Arterien und Arteriolen                                                                                                                                                                                                                                                                                                                                                                                                                                                                                                     |
| J00-J22,<br>J40-J99         | Akute Infektionen der oberen Atemwege, Grippe und Pneumonie, sonstige akute<br>Infektionen der unteren Atemwege, chronische Krankheiten der unteren Atemwege,<br>Lungenkrankheiten durch exogene Substanzen, sonstige Krankheiten der<br>Atmungsorgane, die hauptsächlich das Interstitium betreffen, Purulente und<br>nekrotisierende Krankheitszustände der unteren Atemwege, sonstige Krankheiten<br>der Pleura, sonstige Krankheiten des Atmungssystems                                                                                          |
| J06                         | Akute Infektionen an mehreren oder nicht näher bezeichneten Lokalisationen der<br>oberen Atemwege                                                                                                                                                                                                                                                                                                                                                                                                                                                    |
| J12-J18;<br>J20-J22,<br>J44 | Viruspneumonie, anderenorts nicht klassifiziert, Pneumonie durch Streptococcus<br>pneumoniae, Pneumonie durch Haemophilus influenzae, Pneumonie durch<br>Bakterien, anderenorts nicht klassifiziert, Pneumonie durch sonstige<br>Infektionserreger, anderenorts nicht klassifiziert, Pneumonie bei anderenorts<br>klassifizierten Krankheiten, Pneumonie, Erreger nicht näher bezeichnet, akute<br>Bronchitis, akute Bronchiolitis, akute Infektion der unteren Atemwege, nicht näher<br>bezeichnet, sonstige chronische obstruktive Lungenkrankheit |
| J18                         | Pneumonie, Erreger nicht näher bezeichnet                                                                                                                                                                                                                                                                                                                                                                                                                                                                                                            |
| J40                         | Bronchitis, nicht als akut oder chronisch bezeichnet                                                                                                                                                                                                                                                                                                                                                                                                                                                                                                 |
| J96                         | Respiratorische Insuffizienz, anderenorts nicht klassifiziert                                                                                                                                                                                                                                                                                                                                                                                                                                                                                        |
| K29                         | Gastritis und Duodenitis                                                                                                                                                                                                                                                                                                                                                                                                                                                                                                                             |
| L30                         | Sonstige Dermatitis                                                                                                                                                                                                                                                                                                                                                                                                                                                                                                                                  |
| M25                         | Sonstige Gelenkrankheiten, anderenorts nicht klassifiziert                                                                                                                                                                                                                                                                                                                                                                                                                                                                                           |
| M30                         | Panarteriitis nodosa und verwandte Zustände                                                                                                                                                                                                                                                                                                                                                                                                                                                                                                          |
| M31                         | Sonstige nekrotisierende Vaskulopathien                                                                                                                                                                                                                                                                                                                                                                                                                                                                                                              |

|             |                                                                                                                                                                                                                                                                                                                                                                                                                                                                                          |
|-------------|------------------------------------------------------------------------------------------------------------------------------------------------------------------------------------------------------------------------------------------------------------------------------------------------------------------------------------------------------------------------------------------------------------------------------------------------------------------------------------------|
| M31.3       | Granulomatose mit Polyangiitis (GPA)/Wegener-Granulomatose<br>inkl. Granulomatose mit Polyangiitis mit Lungenbeteiligung (J99.1), Granulomatose mit Polyangiitis mit Nierenbeteiligung (N08.5), nekrotisierende Granulomatose der Atemwege                                                                                                                                                                                                                                               |
| M31.7       | Mikroskopische Polyangiitis (MPA)<br>inkl. mikroskopische Polyarteriitis, exkl. Polyarteriitis nodosa (M30.0)                                                                                                                                                                                                                                                                                                                                                                            |
| M31.9       | Nekrotisierende Vaskulopathie, nicht näher bezeichnet                                                                                                                                                                                                                                                                                                                                                                                                                                    |
| M35.2       | Behçet-Krankheit                                                                                                                                                                                                                                                                                                                                                                                                                                                                         |
| M47         | Spondylose                                                                                                                                                                                                                                                                                                                                                                                                                                                                               |
| M54         | Rückenschmerzen                                                                                                                                                                                                                                                                                                                                                                                                                                                                          |
| M79         | Sonstige Krankheiten des Weichteilgewebes, anderenorts nicht klassifiziert                                                                                                                                                                                                                                                                                                                                                                                                               |
| M99         | Biomechanische Funktionsstörungen, anderenorts nicht klassifiziert                                                                                                                                                                                                                                                                                                                                                                                                                       |
| N00-N29     | Glomeruläre Krankheiten, tubulointerstitielle Nierenkrankheiten, Niereninsuffizienz, Urolithiasis, sonstige Krankheiten der Niere und des Ureters                                                                                                                                                                                                                                                                                                                                        |
| N05         | Nicht näher bezeichnetes nephritisches Syndrom                                                                                                                                                                                                                                                                                                                                                                                                                                           |
| N08         | Glomeruläre Krankheiten bei anderenorts klassifizierten Krankheiten                                                                                                                                                                                                                                                                                                                                                                                                                      |
| N18         | Chronische Nierenkrankheit                                                                                                                                                                                                                                                                                                                                                                                                                                                               |
| N18.3/.4/.5 | Chronische Nierenkrankheit Stadium 3<br>inkl. glomeruläre Filtrationsrate (GFR) 30 bis unter 60 ml/min/1,73 m <sup>2</sup> Körperoberfläche<br>Chronische Nierenkrankheit Stadium 4<br>inkl. GFR 15 bis unter 30 ml/min/1,73 m <sup>2</sup> Körperoberfläche (präterminale Niereninsuffizienz)<br>Chronische Nierenkrankheit Stadium 5<br>inkl. dialysepflichtige chronische Niereninsuffizienz, GFR unter 15 ml/min/1,73 m <sup>2</sup> Körperoberfläche (terminale Niereninsuffizienz) |
| N19         | Nicht näher bezeichnete Niereninsuffizienz                                                                                                                                                                                                                                                                                                                                                                                                                                               |
| N39         | Sonstige Krankheiten des Harnsystems                                                                                                                                                                                                                                                                                                                                                                                                                                                     |
| R10         | Bauch- und Beckenschmerzen                                                                                                                                                                                                                                                                                                                                                                                                                                                               |
| R52         | Schmerz, anderenorts nicht klassifiziert                                                                                                                                                                                                                                                                                                                                                                                                                                                 |
| R65         | Systemisches inflammatorisches Response-Syndrom                                                                                                                                                                                                                                                                                                                                                                                                                                          |

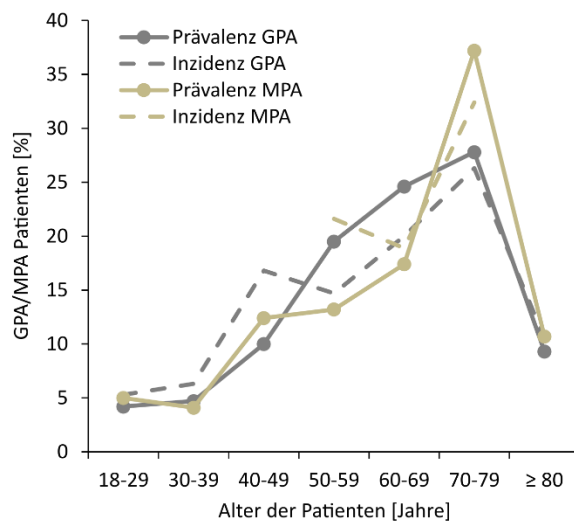

**Abb. S1:** Altersverteilung der prävalenten und inzidenten GPA- und MPA-Patienten.

Für die Bestimmung der Altersverteilung bei prävalenten und inzidenten GPA- und MPA-Patienten wurde die entsprechende Studienpopulation für das Indexjahr ausgewertet. Unterhalb von 50 Jahren und oberhalb von 80 Jahren lag das Inzidenzrisiko für MPA unter der Empfindlichkeitsschwelle von < 5 Personen.

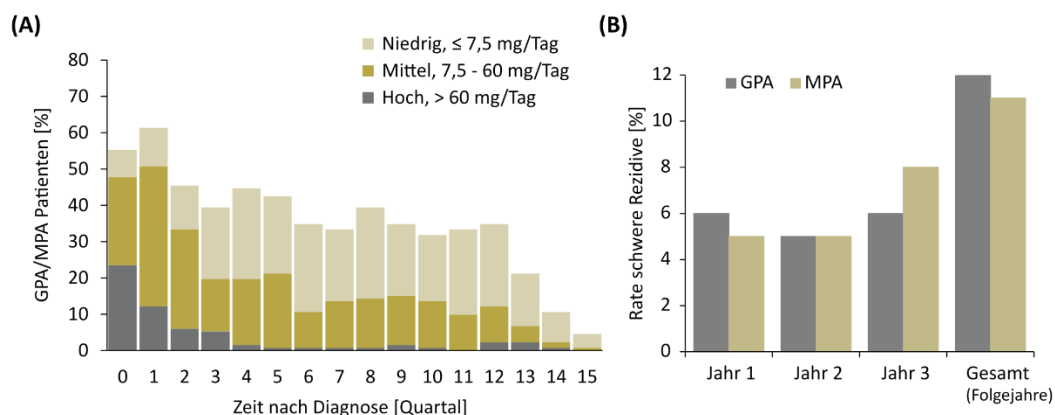

**Abb. S2: (A)** Ambulant verordnete Glukokortikoide bei inzidenten GPA- und MPA-Patienten ab Diagnose bis 15 Quartale nach Diagnose.

Für inzidente GPA- und MPA-Patienten wurde die Dosierung der Glukokortikoide pro Quartal berechnet, beginnend mit dem Quartal der Diagnose unter Verwendung der PZN-Code-Information für die Substanz H02AB (Glukokortikoide). Jede Dosisberechnung erstreckte sich über die erste und die letzte Verschreibung (mindestens 2) innerhalb des entsprechenden Beobachtungsintervalls. Die Anzahl der Tage zwischen der ersten und der letzten Verschreibung wurde zur Berechnung der Tagesdosis herangezogen, wobei die letzte Verschreibung des Intervalls von der Berechnung ausgeschlossen wurde. Die Menge wurde dann in 4 Eskalationsstufen eingeteilt (keine Verschreibung;  $\leq 7,5$  mg/Tag „niedrig“; 7,5 - 60 mg/Tag „mittel“;  $> 60$  mg/Tag „hoch“ in Bezug auf Prednison-Äquivalente). Im Falle einer Änderung der Verschreibung innerhalb eines Quartals wurde nur die höchste Eskalationsstufe berücksichtigt. Die stationäre Verschreibung von Glukokortikoiden wurde in dieser Studie nicht untersucht.

**(B)** Rate schwerer Rezidive bei inzidenten GPA- und MPA-Patienten über 3 Folgejahre.

Schwere Rezidive von inzidenten GPA- und MPA-Patienten wurden im Anschluss an die Induktionsphase für jedes Folgejahr ermittelt und als Verschreibung von hoch dosierten Glukokortikoiden ( $> 60$  mg/Tag Prednison-Äquivalente) in Kombination mit Cyclophosphamid oder Rituximab nach einer Periode niedrig dosierter Glukokortikoide (Erhaltungstherapie) definiert. Die Erhebung eines schweren Rezidivs lehnt sich somit an dessen gebräuchliche Definition an, wie sie auch in der S1-Leitlinie zur Diagnostik und Therapie der AAV zu finden ist (Schirmer et al., Z Rheumatol 2017).
